# Supplementary material
Source: publisher figshare collection journal article supplement (https://acs.figshare.com/ndownloader/files/4557421)
Supplement: Supplementary file 1 [file 4557421]

data_06mr003m 

_audit_creation_method            SHELXL-97 
_chemical_name_systematic 
; 
 ? 
; 
_chemical_name_common             ? 
_chemical_melting_point           ? 
_chemical_formula_moiety          ? 
_chemical_formula_sum 
 'C44 H24 N4 O2 Pt' 
_chemical_formula_weight          835.76 

loop_ 
 _atom_type_symbol 
 _atom_type_description 
 _atom_type_scat_dispersion_real 
 _atom_type_scat_dispersion_imag 
 _atom_type_scat_source 
 'C'  'C'   0.0033   0.0016 
 'International Tables Vol C Tables 4.2.6.8 and 6.1.1.4' 
 'H'  'H'   0.0000   0.0000 
 'International Tables Vol C Tables 4.2.6.8 and 6.1.1.4' 
 'N'  'N'   0.0061   0.0033 
 'International Tables Vol C Tables 4.2.6.8 and 6.1.1.4' 
 'O'  'O'   0.0106   0.0060 
 'International Tables Vol C Tables 4.2.6.8 and 6.1.1.4' 
 'Pt'  'Pt'  -1.7033   8.3905 
 'International Tables Vol C Tables 4.2.6.8 and 6.1.1.4' 

_symmetry_cell_setting            Triclinic 
_symmetry_space_group_name_H-M    P-1 

loop_ 
 _symmetry_equiv_pos_as_xyz 
 'x, y, z' 
 '-x, -y, -z' 

_cell_length_a                    8.8735(4) 
_cell_length_b                    12.9285(6) 
_cell_length_c                    14.3297(6) 
_cell_angle_alpha                 88.7850(10) 
_cell_angle_beta                  82.2480(10) 
_cell_angle_gamma                 72.4220(10) 
_cell_volume                      1552.50(12) 
_cell_formula_units_Z             2 
_cell_measurement_temperature     100(2) 
_cell_measurement_reflns_used     7535 
_cell_measurement_theta_min       2.21 
_cell_measurement_theta_max       30.52 

_exptl_crystal_description        needle 
_exptl_crystal_colour             green 
_exptl_crystal_size_max           0.43 
_exptl_crystal_size_mid           0.12 
_exptl_crystal_size_min           0.09 
_exptl_crystal_density_meas       ? 
_exptl_crystal_density_diffrn     1.788 
_exptl_crystal_density_method     'not measured' 
_exptl_crystal_F_000              820 
_exptl_absorpt_coefficient_mu     4.569 
_exptl_absorpt_correction_type    'multi-scan'
_exptl_absorpt_correction_T_min   0.377 
_exptl_absorpt_correction_T_max   0.663 
_exptl_absorpt_process_details    'SADABS in SAINT+ (Bruker, 2003)'

_exptl_special_details 
; 
 ? 
; 

_diffrn_ambient_temperature       100(2) 
_diffrn_radiation_wavelength      0.71073 
_diffrn_radiation_type            MoK\a 
_diffrn_radiation_source          'fine-focus sealed tube' 
_diffrn_radiation_monochromator   graphite 
_diffrn_measurement_device_type   'Bruker AXS SMART APEX CCD diffractometer'  
_diffrn_measurement_method        '\w scans' 
_diffrn_detector_area_resol_mean  ? 
_diffrn_standards_number          0 
_diffrn_standards_interval_count  ? 
_diffrn_standards_interval_time   ? 
_diffrn_standards_decay_%         none
_diffrn_reflns_number             16206 
_diffrn_reflns_av_R_equivalents   0.0188 
_diffrn_reflns_av_sigmaI/netI     0.0284 
_diffrn_reflns_limit_h_min        -11 
_diffrn_reflns_limit_h_max        11 
_diffrn_reflns_limit_k_min        -17 
_diffrn_reflns_limit_k_max        16 
_diffrn_reflns_limit_l_min        -19 
_diffrn_reflns_limit_l_max        19 
_diffrn_reflns_theta_min          1.43 
_diffrn_reflns_theta_max          28.28 
_reflns_number_total              7670 
_reflns_number_gt                 7297 
_reflns_threshold_expression      I>2\s(I) 

_computing_data_collection        'SMART 5.630 (Bruker, 1997-2002)' 
_computing_cell_refinement        'SAINT+ 6.45 (Bruker, 2003)' 
_computing_data_reduction         'SAINT+ 6.45' 
_computing_structure_solution     'SHELXTL 6.10 (Bruker, 2000)' 
_computing_structure_refinement   'SHELXTL 6.10' 
_computing_molecular_graphics     'SHELXTL 6.10' 
_computing_publication_material   'SHELXTL 6.10' 

_refine_special_details 
; 
 Refinement of F^2^ against ALL reflections.  The weighted R-factor wR and 
 goodness of fit S are based on F^2^, conventional R-factors R are based 
 on F, with F set to zero for negative F^2^. The threshold expression of 
 F^2^ > 2sigma(F^2^) is used only for calculating R-factors(gt) etc. and is 
 not relevant to the choice of reflections for refinement.  R-factors based 
 on F^2^ are statistically about twice as large as those based on F, and R- 
 factors based on ALL data will be even larger. 
; 

_refine_ls_structure_factor_coef  Fsqd 
_refine_ls_matrix_type            full 
_refine_ls_weighting_scheme       calc 
_refine_ls_weighting_details 
 'calc w=1/[\s^2^(Fo^2^)+(0.0399P)^2^+0.7083P] where P=(Fo^2^+2Fc^2^)/3' 
_atom_sites_solution_primary      direct 
_atom_sites_solution_secondary    difmap 
_atom_sites_solution_hydrogens    geom 
_refine_ls_hydrogen_treatment     constr
_refine_ls_extinction_method      none 
_refine_ls_extinction_coef        ? 
_refine_ls_number_reflns          7670 
_refine_ls_number_parameters      460 
_refine_ls_number_restraints      0 
_refine_ls_R_factor_all           0.0260 
_refine_ls_R_factor_gt            0.0247 
_refine_ls_wR_factor_ref          0.0635 
_refine_ls_wR_factor_gt           0.0628 
_refine_ls_goodness_of_fit_ref    1.074 
_refine_ls_restrained_S_all       1.074 
_refine_ls_shift/su_max           0.003 
_refine_ls_shift/su_mean          0.000 

loop_ 
 _atom_site_label 
 _atom_site_type_symbol 
 _atom_site_fract_x 
 _atom_site_fract_y 
 _atom_site_fract_z 
 _atom_site_U_iso_or_equiv 
 _atom_site_adp_type 
 _atom_site_occupancy 
 _atom_site_symmetry_multiplicity 
 _atom_site_calc_flag 
 _atom_site_refinement_flags 
 _atom_site_disorder_assembly 
 _atom_site_disorder_group 
C1 C 0.6159(3) 0.7374(2) 0.80663(18) 0.0179(5) Uani 1 1 d . . . 
C2 C 0.5580(3) 0.8418(2) 0.86335(19) 0.0200(5) Uani 1 1 d . . . 
C3 C 0.4387(3) 0.8251(2) 0.9407(2) 0.0213(5) Uani 1 1 d . . . 
C4 C 0.3527(4) 0.8958(2) 1.0134(2) 0.0249(6) Uani 1 1 d . . . 
H4 H 0.3701 0.9639 1.0213 0.030 Uiso 1 1 calc R . . 
C5 C 0.2398(4) 0.8643(3) 1.0747(2) 0.0277(6) Uani 1 1 d . . . 
H5 H 0.1810 0.9104 1.1264 0.033 Uiso 1 1 calc R . . 
C6 C 0.2129(4) 0.7661(3) 1.0608(2) 0.0279(6) Uani 1 1 d . . . 
H6 H 0.1337 0.7465 1.1025 0.033 Uiso 1 1 calc R . . 
C7 C 0.3000(4) 0.6948(2) 0.9864(2) 0.0255(6) Uani 1 1 d . . . 
H7 H 0.2794 0.6279 0.9773 0.031 Uiso 1 1 calc R . . 
C8 C 0.4165(3) 0.7235(2) 0.92640(19) 0.0204(5) Uani 1 1 d . . . 
C9 C 0.5259(3) 0.6702(2) 0.84122(18) 0.0178(5) Uani 1 1 d . . . 
C10 C 0.5402(3) 0.5694(2) 0.80227(18) 0.0176(5) Uani 1 1 d . . . 
C11 C 0.4826(3) 0.4846(2) 0.8448(2) 0.0213(5) Uani 1 1 d . . . 
H11 H 0.4244 0.4870 0.9059 0.026 Uiso 1 1 calc R . . 
C12 C 0.5261(3) 0.4005(2) 0.7821(2) 0.0204(5) Uani 1 1 d . . . 
H12 H 0.5063 0.3325 0.7916 0.024 Uiso 1 1 calc R . . 
C13 C 0.6078(3) 0.4329(2) 0.69827(19) 0.0168(5) Uani 1 1 d . . . 
C14 C 0.6495(3) 0.3760(2) 0.61172(18) 0.0163(5) Uani 1 1 d . . . 
C15 C 0.7002(3) 0.4195(2) 0.52707(19) 0.0170(5) Uani 1 1 d . . . 
C16 C 0.7162(3) 0.3736(2) 0.43490(19) 0.0197(5) Uani 1 1 d . . . 
H16 H 0.7011 0.3063 0.4207 0.024 Uiso 1 1 calc R . . 
C17 C 0.7570(3) 0.4433(2) 0.37132(19) 0.0196(5) Uani 1 1 d . . . 
H17 H 0.7711 0.4354 0.3047 0.024 Uiso 1 1 calc R . . 
C18 C 0.7749(3) 0.5311(2) 0.42365(18) 0.0170(5) Uani 1 1 d . . . 
C19 C 0.8268(3) 0.6163(2) 0.38427(18) 0.0174(5) Uani 1 1 d . . . 
C20 C 0.8606(3) 0.6944(2) 0.43670(19) 0.0177(5) Uani 1 1 d . . . 
C21 C 0.9321(3) 0.7743(2) 0.3983(2) 0.0221(5) Uani 1 1 d . . . 
H21 H 0.9541 0.7885 0.3333 0.027 Uiso 1 1 calc R . . 
C22 C 0.9629(3) 0.8258(2) 0.4713(2) 0.0220(5) Uani 1 1 d . . . 
H22 H 1.0117 0.8821 0.4670 0.026 Uiso 1 1 calc R . . 
C23 C 0.9083(3) 0.7800(2) 0.55647(19) 0.0180(5) Uani 1 1 d . . . 
C24 C 0.9227(3) 0.8025(2) 0.64888(19) 0.0171(5) Uani 1 1 d . . . 
C25 C 1.0289(3) 0.8611(2) 0.6803(2) 0.0197(5) Uani 1 1 d . . . 
C26 C 1.1328(3) 0.9109(2) 0.6319(2) 0.0238(6) Uani 1 1 d . . . 
H26 H 1.1476 0.9113 0.5650 0.029 Uiso 1 1 calc R . . 
C27 C 1.2157(4) 0.9606(2) 0.6837(2) 0.0287(6) Uani 1 1 d . . . 
H27 H 1.2853 0.9965 0.6509 0.034 Uiso 1 1 calc R . . 
C28 C 1.1996(4) 0.9593(2) 0.7805(2) 0.0292(6) Uani 1 1 d . . . 
H28 H 1.2568 0.9944 0.8137 0.035 Uiso 1 1 calc R . . 
C29 C 1.0985(4) 0.9059(2) 0.8303(2) 0.0260(6) Uani 1 1 d . . . 
H29 H 1.0883 0.9024 0.8970 0.031 Uiso 1 1 calc R . . 
C30 C 1.0144(3) 0.8587(2) 0.7793(2) 0.0222(5) Uani 1 1 d . . . 
C31 C 0.8996(3) 0.7990(2) 0.8142(2) 0.0213(5) Uani 1 1 d . . . 
C32 C 0.8387(3) 0.7726(2) 0.72787(19) 0.0180(5) Uani 1 1 d . . . 
C33 C 0.6311(3) 0.2651(2) 0.61178(18) 0.0162(5) Uani 1 1 d . . . 
C34 C 0.7050(3) 0.1885(2) 0.67545(19) 0.0183(5) Uani 1 1 d . . . 
H34 H 0.7688 0.2077 0.7162 0.022 Uiso 1 1 calc R . . 
C35 C 0.6871(3) 0.0854(2) 0.6803(2) 0.0209(5) Uani 1 1 d . . . 
H35 H 0.7364 0.0354 0.7248 0.025 Uiso 1 1 calc R . . 
C36 C 0.5965(3) 0.0557(2) 0.6197(2) 0.0228(5) Uani 1 1 d . . . 
H36 H 0.5849 -0.0151 0.6221 0.027 Uiso 1 1 calc R . . 
C37 C 0.5235(3) 0.1293(2) 0.5559(2) 0.0218(5) Uani 1 1 d . . . 
H37 H 0.4617 0.1090 0.5145 0.026 Uiso 1 1 calc R . . 
C38 C 0.5402(3) 0.2335(2) 0.55209(19) 0.0195(5) Uani 1 1 d . . . 
H38 H 0.4888 0.2836 0.5083 0.023 Uiso 1 1 calc R . . 
C39 C 0.8539(3) 0.6242(2) 0.27945(19) 0.0199(5) Uani 1 1 d . . . 
C40 C 0.7652(4) 0.7147(2) 0.2349(2) 0.0247(6) Uani 1 1 d . . . 
H40 H 0.6868 0.7714 0.2712 0.030 Uiso 1 1 calc R . . 
C41 C 0.7913(4) 0.7220(3) 0.1371(2) 0.0316(7) Uani 1 1 d . . . 
H41 H 0.7304 0.7836 0.1068 0.038 Uiso 1 1 calc R . . 
C42 C 0.9057(5) 0.6397(3) 0.0841(2) 0.0376(8) Uani 1 1 d . . . 
H42 H 0.9227 0.6446 0.0174 0.045 Uiso 1 1 calc R . . 
C43 C 0.9954(5) 0.5502(3) 0.1279(2) 0.0363(8) Uani 1 1 d . . . 
H43 H 1.0750 0.4943 0.0915 0.044 Uiso 1 1 calc R . . 
C44 C 0.9690(4) 0.5422(3) 0.2250(2) 0.0271(6) Uani 1 1 d . . . 
H44 H 1.0300 0.4802 0.2547 0.033 Uiso 1 1 calc R . . 
N1 N 0.7276(3) 0.71891(18) 0.72897(16) 0.0163(4) Uani 1 1 d . . . 
N2 N 0.6188(3) 0.53562(18) 0.71289(16) 0.0153(4) Uani 1 1 d . . . 
N3 N 0.7371(3) 0.51646(17) 0.51908(16) 0.0151(4) Uani 1 1 d . . . 
N4 N 0.8427(3) 0.70123(18) 0.53392(16) 0.0161(4) Uani 1 1 d . . . 
O1 O 0.5901(3) 0.92505(16) 0.84526(15) 0.0255(4) Uani 1 1 d . . . 
O2 O 0.8707(3) 0.77111(19) 0.89424(15) 0.0314(5) Uani 1 1 d . . . 
Pt1 Pt 0.731980(10) 0.617812(7) 0.623818(6) 0.01535(4) Uani 1 1 d . . . 

loop_ 
 _atom_site_aniso_label 
 _atom_site_aniso_U_11 
 _atom_site_aniso_U_22 
 _atom_site_aniso_U_33 
 _atom_site_aniso_U_23 
 _atom_site_aniso_U_13 
 _atom_site_aniso_U_12 
C1 0.0212(12) 0.0155(12) 0.0175(12) -0.0001(9) -0.0020(10) -0.0063(10) 
C2 0.0231(13) 0.0198(13) 0.0195(13) -0.0023(10) -0.0052(10) -0.0090(10) 
C3 0.0228(13) 0.0216(13) 0.0217(13) -0.0017(10) -0.0034(10) -0.0095(11) 
C4 0.0281(14) 0.0259(14) 0.0228(14) -0.0051(11) -0.0043(11) -0.0105(12) 
C5 0.0311(15) 0.0298(15) 0.0211(14) -0.0054(12) -0.0011(11) -0.0083(12) 
C6 0.0298(15) 0.0312(15) 0.0213(14) -0.0018(12) 0.0042(11) -0.0103(12) 
C7 0.0310(15) 0.0227(14) 0.0240(14) -0.0032(11) 0.0008(11) -0.0116(12) 
C8 0.0233(13) 0.0212(13) 0.0176(12) -0.0015(10) -0.0025(10) -0.0081(10) 
C9 0.0215(12) 0.0177(12) 0.0146(12) 0.0007(9) -0.0014(9) -0.0068(10) 
C10 0.0198(12) 0.0177(12) 0.0164(12) 0.0013(9) -0.0016(9) -0.0080(10) 
C11 0.0271(14) 0.0204(13) 0.0180(13) 0.0019(10) 0.0008(10) -0.0112(11) 
C12 0.0254(13) 0.0171(12) 0.0201(13) 0.0022(10) -0.0010(10) -0.0098(10) 
C13 0.0199(12) 0.0144(11) 0.0180(12) 0.0024(9) -0.0035(9) -0.0077(9) 
C14 0.0166(11) 0.0132(11) 0.0188(12) 0.0006(9) -0.0025(9) -0.0040(9) 
C15 0.0152(11) 0.0141(11) 0.0201(12) 0.0003(9) -0.0023(9) -0.0023(9) 
C16 0.0225(13) 0.0152(12) 0.0191(13) -0.0016(10) -0.0007(10) -0.0030(10) 
C17 0.0228(13) 0.0158(12) 0.0186(12) -0.0007(10) -0.0019(10) -0.0037(10) 
C18 0.0169(12) 0.0166(12) 0.0155(12) 0.0011(9) -0.0009(9) -0.0028(9) 
C19 0.0154(11) 0.0184(12) 0.0164(12) 0.0041(9) -0.0014(9) -0.0025(9) 
C20 0.0151(11) 0.0194(12) 0.0177(12) 0.0046(10) -0.0011(9) -0.0046(10) 
C21 0.0211(13) 0.0235(13) 0.0227(13) 0.0057(11) 0.0003(10) -0.0098(11) 
C22 0.0229(13) 0.0191(13) 0.0253(14) 0.0035(11) 0.0001(11) -0.0098(10) 
C23 0.0159(12) 0.0146(11) 0.0236(13) 0.0020(10) -0.0005(10) -0.0056(9) 
C24 0.0152(11) 0.0116(11) 0.0242(13) 0.0025(9) -0.0023(9) -0.0042(9) 
C25 0.0168(12) 0.0128(11) 0.0294(14) 0.0008(10) -0.0045(10) -0.0041(9) 
C26 0.0200(13) 0.0181(13) 0.0335(16) 0.0007(11) -0.0019(11) -0.0067(10) 
C27 0.0198(13) 0.0203(14) 0.0480(19) 0.0009(13) -0.0043(12) -0.0093(11) 
C28 0.0224(14) 0.0242(14) 0.0454(19) 0.0011(13) -0.0145(13) -0.0093(11) 
C29 0.0241(14) 0.0254(14) 0.0320(16) 0.0019(12) -0.0117(12) -0.0093(11) 
C30 0.0197(13) 0.0175(12) 0.0304(15) 0.0012(11) -0.0067(11) -0.0055(10) 
C31 0.0220(13) 0.0175(12) 0.0264(14) 0.0031(10) -0.0083(11) -0.0067(10) 
C32 0.0182(12) 0.0149(11) 0.0219(13) 0.0034(9) -0.0052(10) -0.0058(9) 
C33 0.0177(12) 0.0135(11) 0.0168(12) -0.0007(9) 0.0012(9) -0.0050(9) 
C34 0.0195(12) 0.0152(12) 0.0214(13) 0.0012(10) -0.0027(10) -0.0069(9) 
C35 0.0225(13) 0.0149(12) 0.0247(14) 0.0041(10) -0.0014(10) -0.0057(10) 
C36 0.0240(13) 0.0159(12) 0.0284(14) -0.0023(10) 0.0000(11) -0.0073(10) 
C37 0.0211(13) 0.0188(13) 0.0264(14) -0.0034(10) -0.0012(10) -0.0077(10) 
C38 0.0204(12) 0.0171(12) 0.0200(13) -0.0011(10) -0.0024(10) -0.0042(10) 
C39 0.0230(13) 0.0222(13) 0.0163(12) 0.0043(10) -0.0016(10) -0.0102(10) 
C40 0.0281(14) 0.0234(14) 0.0263(14) 0.0081(11) -0.0062(11) -0.0128(11) 
C41 0.0414(18) 0.0348(17) 0.0267(15) 0.0151(13) -0.0135(13) -0.0207(14) 
C42 0.059(2) 0.045(2) 0.0185(14) 0.0046(14) -0.0046(14) -0.0310(18) 
C43 0.050(2) 0.0370(18) 0.0211(15) -0.0019(13) 0.0051(14) -0.0169(16) 
C44 0.0296(15) 0.0287(15) 0.0210(14) 0.0035(11) 0.0002(11) -0.0074(12) 
N1 0.0162(10) 0.0137(10) 0.0193(11) 0.0032(8) -0.0025(8) -0.0049(8) 
N2 0.0177(10) 0.0131(10) 0.0157(10) 0.0011(8) -0.0014(8) -0.0060(8) 
N3 0.0151(10) 0.0131(10) 0.0168(10) 0.0017(8) -0.0012(8) -0.0042(8) 
N4 0.0164(10) 0.0145(10) 0.0177(11) 0.0024(8) -0.0012(8) -0.0057(8) 
O1 0.0329(11) 0.0194(10) 0.0275(11) -0.0036(8) -0.0004(8) -0.0140(8) 
O2 0.0401(13) 0.0385(13) 0.0245(11) 0.0090(9) -0.0127(9) -0.0224(10) 
Pt1 0.01696(6) 0.01367(6) 0.01599(6) 0.00177(4) -0.00203(4) -0.00565(4) 

_geom_special_details 
; 
 All esds (except the esd in the dihedral angle between two l.s. planes) 
 are estimated using the full covariance matrix.  The cell esds are taken 
 into account individually in the estimation of esds in distances, angles 
 and torsion angles; correlations between esds in cell parameters are only 
 used when they are defined by crystal symmetry.  An approximate (isotropic) 
 treatment of cell esds is used for estimating esds involving l.s. planes. 
; 

loop_ 
 _geom_bond_atom_site_label_1 
 _geom_bond_atom_site_label_2 
 _geom_bond_distance 
 _geom_bond_site_symmetry_2 
 _geom_bond_publ_flag 
C1 N1 1.360(3) . ? 
C1 C9 1.389(4) . ? 
C1 C2 1.504(4) . ? 
C2 O1 1.208(3) . ? 
C2 C3 1.486(4) . ? 
C3 C4 1.382(4) . ? 
C3 C8 1.409(4) . ? 
C4 C5 1.391(4) . ? 
C4 H4 0.9500 . ? 
C5 C6 1.385(4) . ? 
C5 H5 0.9500 . ? 
C6 C7 1.405(4) . ? 
C6 H6 0.9500 . ? 
C7 C8 1.387(4) . ? 
C7 H7 0.9500 . ? 
C8 C9 1.489(4) . ? 
C9 C10 1.392(4) . ? 
C10 N2 1.384(3) . ? 
C10 C11 1.437(4) . ? 
C11 C12 1.354(4) . ? 
C11 H11 0.9500 . ? 
C12 C13 1.439(4) . ? 
C12 H12 0.9500 . ? 
C13 N2 1.383(3) . ? 
C13 C14 1.402(4) . ? 
C14 C15 1.402(4) . ? 
C14 C33 1.491(3) . ? 
C15 N3 1.387(3) . ? 
C15 C16 1.431(4) . ? 
C16 C17 1.359(4) . ? 
C16 H16 0.9500 . ? 
C17 C18 1.432(4) . ? 
C17 H17 0.9500 . ? 
C18 N3 1.386(3) . ? 
C18 C19 1.397(4) . ? 
C19 C20 1.397(4) . ? 
C19 C39 1.495(4) . ? 
C20 N4 1.382(3) . ? 
C20 C21 1.432(4) . ? 
C21 C22 1.353(4) . ? 
C21 H21 0.9500 . ? 
C22 C23 1.434(4) . ? 
C22 H22 0.9500 . ? 
C23 N4 1.380(3) . ? 
C23 C24 1.392(4) . ? 
C24 C32 1.384(4) . ? 
C24 C25 1.492(4) . ? 
C25 C26 1.383(4) . ? 
C25 C30 1.408(4) . ? 
C26 C27 1.399(4) . ? 
C26 H26 0.9500 . ? 
C27 C28 1.376(5) . ? 
C27 H27 0.9500 . ? 
C28 C29 1.403(4) . ? 
C28 H28 0.9500 . ? 
C29 C30 1.380(4) . ? 
C29 H29 0.9500 . ? 
C30 C31 1.485(4) . ? 
C31 O2 1.212(4) . ? 
C31 C32 1.500(4) . ? 
C32 N1 1.364(3) . ? 
C33 C38 1.396(4) . ? 
C33 C34 1.405(4) . ? 
C34 C35 1.388(4) . ? 
C34 H34 0.9500 . ? 
C35 C36 1.392(4) . ? 
C35 H35 0.9500 . ? 
C36 C37 1.383(4) . ? 
C36 H36 0.9500 . ? 
C37 C38 1.398(4) . ? 
C37 H37 0.9500 . ? 
C38 H38 0.9500 . ? 
C39 C40 1.393(4) . ? 
C39 C44 1.394(4) . ? 
C40 C41 1.396(4) . ? 
C40 H40 0.9500 . ? 
C41 C42 1.384(5) . ? 
C41 H41 0.9500 . ? 
C42 C43 1.384(5) . ? 
C42 H42 0.9500 . ? 
C43 C44 1.385(4) . ? 
C43 H43 0.9500 . ? 
C44 H44 0.9500 . ? 
N1 Pt1 2.004(2) . ? 
N2 Pt1 2.002(2) . ? 
N3 Pt1 2.000(2) . ? 
N4 Pt1 2.007(2) . ? 

loop_ 
 _geom_angle_atom_site_label_1 
 _geom_angle_atom_site_label_2 
 _geom_angle_atom_site_label_3 
 _geom_angle 
 _geom_angle_site_symmetry_1 
 _geom_angle_site_symmetry_3 
 _geom_angle_publ_flag 
N1 C1 C9 126.9(2) . . ? 
N1 C1 C2 124.0(2) . . ? 
C9 C1 C2 108.8(2) . . ? 
O1 C2 C3 126.9(3) . . ? 
O1 C2 C1 127.5(3) . . ? 
C3 C2 C1 105.3(2) . . ? 
C4 C3 C8 122.8(3) . . ? 
C4 C3 C2 128.4(3) . . ? 
C8 C3 C2 108.6(2) . . ? 
C3 C4 C5 118.0(3) . . ? 
C3 C4 H4 121.0 . . ? 
C5 C4 H4 121.0 . . ? 
C6 C5 C4 120.3(3) . . ? 
C6 C5 H5 119.9 . . ? 
C4 C5 H5 119.9 . . ? 
C5 C6 C7 121.5(3) . . ? 
C5 C6 H6 119.3 . . ? 
C7 C6 H6 119.3 . . ? 
C8 C7 C6 118.9(3) . . ? 
C8 C7 H7 120.6 . . ? 
C6 C7 H7 120.6 . . ? 
C7 C8 C3 118.5(3) . . ? 
C7 C8 C9 133.1(3) . . ? 
C3 C8 C9 108.4(2) . . ? 
C1 C9 C10 124.6(2) . . ? 
C1 C9 C8 108.6(2) . . ? 
C10 C9 C8 126.8(2) . . ? 
N2 C10 C9 122.9(2) . . ? 
N2 C10 C11 109.1(2) . . ? 
C9 C10 C11 127.9(2) . . ? 
C12 C11 C10 107.6(2) . . ? 
C12 C11 H11 126.2 . . ? 
C10 C11 H11 126.2 . . ? 
C11 C12 C13 107.4(2) . . ? 
C11 C12 H12 126.3 . . ? 
C13 C12 H12 126.3 . . ? 
N2 C13 C14 125.2(2) . . ? 
N2 C13 C12 109.1(2) . . ? 
C14 C13 C12 125.2(2) . . ? 
C13 C14 C15 123.6(2) . . ? 
C13 C14 C33 116.5(2) . . ? 
C15 C14 C33 119.8(2) . . ? 
N3 C15 C14 125.3(2) . . ? 
N3 C15 C16 109.0(2) . . ? 
C14 C15 C16 125.7(2) . . ? 
C17 C16 C15 107.9(2) . . ? 
C17 C16 H16 126.1 . . ? 
C15 C16 H16 126.1 . . ? 
C16 C17 C18 107.1(2) . . ? 
C16 C17 H17 126.4 . . ? 
C18 C17 H17 126.4 . . ? 
N3 C18 C19 125.6(2) . . ? 
N3 C18 C17 109.4(2) . . ? 
C19 C18 C17 125.0(2) . . ? 
C20 C19 C18 124.2(2) . . ? 
C20 C19 C39 116.6(2) . . ? 
C18 C19 C39 119.2(2) . . ? 
N4 C20 C19 125.4(2) . . ? 
N4 C20 C21 109.2(2) . . ? 
C19 C20 C21 125.2(2) . . ? 
C22 C21 C20 107.5(2) . . ? 
C22 C21 H21 126.3 . . ? 
C20 C21 H21 126.3 . . ? 
C21 C22 C23 107.6(2) . . ? 
C21 C22 H22 126.2 . . ? 
C23 C22 H22 126.2 . . ? 
N4 C23 C24 122.4(2) . . ? 
N4 C23 C22 109.1(2) . . ? 
C24 C23 C22 128.5(2) . . ? 
C32 C24 C23 124.6(2) . . ? 
C32 C24 C25 108.5(2) . . ? 
C23 C24 C25 126.9(2) . . ? 
C26 C25 C30 119.1(3) . . ? 
C26 C25 C24 132.9(3) . . ? 
C30 C25 C24 108.0(2) . . ? 
C25 C26 C27 118.5(3) . . ? 
C25 C26 H26 120.7 . . ? 
C27 C26 H26 120.7 . . ? 
C28 C27 C26 122.1(3) . . ? 
C28 C27 H27 118.9 . . ? 
C26 C27 H27 118.9 . . ? 
C27 C28 C29 119.9(3) . . ? 
C27 C28 H28 120.1 . . ? 
C29 C28 H28 120.1 . . ? 
C30 C29 C28 118.0(3) . . ? 
C30 C29 H29 121.0 . . ? 
C28 C29 H29 121.0 . . ? 
C29 C30 C25 122.3(3) . . ? 
C29 C30 C31 128.7(3) . . ? 
C25 C30 C31 108.9(2) . . ? 
O2 C31 C30 127.2(3) . . ? 
O2 C31 C32 127.7(3) . . ? 
C30 C31 C32 105.0(2) . . ? 
N1 C32 C24 126.5(2) . . ? 
N1 C32 C31 124.1(2) . . ? 
C24 C32 C31 109.2(2) . . ? 
C38 C33 C34 117.6(2) . . ? 
C38 C33 C14 122.9(2) . . ? 
C34 C33 C14 119.5(2) . . ? 
C35 C34 C33 121.6(2) . . ? 
C35 C34 H34 119.2 . . ? 
C33 C34 H34 119.2 . . ? 
C34 C35 C36 119.7(3) . . ? 
C34 C35 H35 120.2 . . ? 
C36 C35 H35 120.2 . . ? 
C37 C36 C35 119.8(3) . . ? 
C37 C36 H36 120.1 . . ? 
C35 C36 H36 120.1 . . ? 
C36 C37 C38 120.3(3) . . ? 
C36 C37 H37 119.9 . . ? 
C38 C37 H37 119.9 . . ? 
C33 C38 C37 121.0(3) . . ? 
C33 C38 H38 119.5 . . ? 
C37 C38 H38 119.5 . . ? 
C40 C39 C44 119.0(3) . . ? 
C40 C39 C19 120.3(3) . . ? 
C44 C39 C19 120.7(2) . . ? 
C39 C40 C41 120.1(3) . . ? 
C39 C40 H40 120.0 . . ? 
C41 C40 H40 120.0 . . ? 
C42 C41 C40 120.1(3) . . ? 
C42 C41 H41 120.0 . . ? 
C40 C41 H41 120.0 . . ? 
C41 C42 C43 120.1(3) . . ? 
C41 C42 H42 120.0 . . ? 
C43 C42 H42 120.0 . . ? 
C42 C43 C44 120.0(3) . . ? 
C42 C43 H43 120.0 . . ? 
C44 C43 H43 120.0 . . ? 
C43 C44 C39 120.7(3) . . ? 
C43 C44 H44 119.7 . . ? 
C39 C44 H44 119.7 . . ? 
C1 N1 C32 115.5(2) . . ? 
C1 N1 Pt1 122.49(18) . . ? 
C32 N1 Pt1 121.97(18) . . ? 
C13 N2 C10 106.7(2) . . ? 
C13 N2 Pt1 126.73(18) . . ? 
C10 N2 Pt1 126.56(17) . . ? 
C18 N3 C15 106.5(2) . . ? 
C18 N3 Pt1 126.41(17) . . ? 
C15 N3 Pt1 127.06(18) . . ? 
C23 N4 C20 106.7(2) . . ? 
C23 N4 Pt1 127.02(18) . . ? 
C20 N4 Pt1 126.24(18) . . ? 
N3 Pt1 N2 89.67(9) . . ? 
N3 Pt1 N1 179.76(8) . . ? 
N2 Pt1 N1 90.29(9) . . ? 
N3 Pt1 N4 90.20(9) . . ? 
N2 Pt1 N4 179.24(8) . . ? 
N1 Pt1 N4 89.85(9) . . ? 

loop_ 
 _geom_torsion_atom_site_label_1 
 _geom_torsion_atom_site_label_2 
 _geom_torsion_atom_site_label_3 
 _geom_torsion_atom_site_label_4 
 _geom_torsion 
 _geom_torsion_site_symmetry_1 
 _geom_torsion_site_symmetry_2 
 _geom_torsion_site_symmetry_3 
 _geom_torsion_site_symmetry_4 
 _geom_torsion_publ_flag 
N1 C1 C2 O1 6.5(5) . . . . ? 
C9 C1 C2 O1 -167.7(3) . . . . ? 
N1 C1 C2 C3 -179.7(2) . . . . ? 
C9 C1 C2 C3 6.1(3) . . . . ? 
O1 C2 C3 C4 -7.6(5) . . . . ? 
C1 C2 C3 C4 178.6(3) . . . . ? 
O1 C2 C3 C8 168.9(3) . . . . ? 
C1 C2 C3 C8 -4.9(3) . . . . ? 
C8 C3 C4 C5 0.1(4) . . . . ? 
C2 C3 C4 C5 176.2(3) . . . . ? 
C3 C4 C5 C6 -1.8(5) . . . . ? 
C4 C5 C6 C7 1.4(5) . . . . ? 
C5 C6 C7 C8 0.7(5) . . . . ? 
C6 C7 C8 C3 -2.2(4) . . . . ? 
C6 C7 C8 C9 -178.3(3) . . . . ? 
C4 C3 C8 C7 1.9(4) . . . . ? 
C2 C3 C8 C7 -174.8(3) . . . . ? 
C4 C3 C8 C9 178.9(3) . . . . ? 
C2 C3 C8 C9 2.1(3) . . . . ? 
N1 C1 C9 C10 2.2(5) . . . . ? 
C2 C1 C9 C10 176.1(3) . . . . ? 
N1 C1 C9 C8 -178.9(3) . . . . ? 
C2 C1 C9 C8 -4.9(3) . . . . ? 
C7 C8 C9 C1 178.1(3) . . . . ? 
C3 C8 C9 C1 1.8(3) . . . . ? 
C7 C8 C9 C10 -2.9(5) . . . . ? 
C3 C8 C9 C10 -179.3(3) . . . . ? 
C1 C9 C10 N2 -15.4(4) . . . . ? 
C8 C9 C10 N2 165.9(3) . . . . ? 
C1 C9 C10 C11 163.5(3) . . . . ? 
C8 C9 C10 C11 -15.3(5) . . . . ? 
N2 C10 C11 C12 0.2(3) . . . . ? 
C9 C10 C11 C12 -178.8(3) . . . . ? 
C10 C11 C12 C13 -1.6(3) . . . . ? 
C11 C12 C13 N2 2.5(3) . . . . ? 
C11 C12 C13 C14 -169.3(3) . . . . ? 
N2 C13 C14 C15 -3.5(4) . . . . ? 
C12 C13 C14 C15 167.0(3) . . . . ? 
N2 C13 C14 C33 179.0(2) . . . . ? 
C12 C13 C14 C33 -10.5(4) . . . . ? 
C13 C14 C15 N3 9.4(4) . . . . ? 
C33 C14 C15 N3 -173.2(2) . . . . ? 
C13 C14 C15 C16 -168.0(3) . . . . ? 
C33 C14 C15 C16 9.4(4) . . . . ? 
N3 C15 C16 C17 -2.1(3) . . . . ? 
C14 C15 C16 C17 175.7(3) . . . . ? 
C15 C16 C17 C18 2.9(3) . . . . ? 
C16 C17 C18 N3 -2.9(3) . . . . ? 
C16 C17 C18 C19 175.5(3) . . . . ? 
N3 C18 C19 C20 5.6(4) . . . . ? 
C17 C18 C19 C20 -172.5(3) . . . . ? 
N3 C18 C19 C39 -176.5(2) . . . . ? 
C17 C18 C19 C39 5.4(4) . . . . ? 
C18 C19 C20 N4 -2.4(4) . . . . ? 
C39 C19 C20 N4 179.7(2) . . . . ? 
C18 C19 C20 C21 171.9(3) . . . . ? 
C39 C19 C20 C21 -6.1(4) . . . . ? 
N4 C20 C21 C22 2.3(3) . . . . ? 
C19 C20 C21 C22 -172.7(3) . . . . ? 
C20 C21 C22 C23 -1.0(3) . . . . ? 
C21 C22 C23 N4 -0.7(3) . . . . ? 
C21 C22 C23 C24 175.9(3) . . . . ? 
N4 C23 C24 C32 -18.2(4) . . . . ? 
C22 C23 C24 C32 165.7(3) . . . . ? 
N4 C23 C24 C25 161.6(2) . . . . ? 
C22 C23 C24 C25 -14.6(4) . . . . ? 
C32 C24 C25 C26 -177.5(3) . . . . ? 
C23 C24 C25 C26 2.7(5) . . . . ? 
C32 C24 C25 C30 4.0(3) . . . . ? 
C23 C24 C25 C30 -175.8(3) . . . . ? 
C30 C25 C26 C27 -2.2(4) . . . . ? 
C24 C25 C26 C27 179.5(3) . . . . ? 
C25 C26 C27 C28 1.5(4) . . . . ? 
C26 C27 C28 C29 0.6(5) . . . . ? 
C27 C28 C29 C30 -1.8(4) . . . . ? 
C28 C29 C30 C25 1.1(4) . . . . ? 
C28 C29 C30 C31 -179.4(3) . . . . ? 
C26 C25 C30 C29 1.0(4) . . . . ? 
C24 C25 C30 C29 179.7(3) . . . . ? 
C26 C25 C30 C31 -178.6(2) . . . . ? 
C24 C25 C30 C31 0.1(3) . . . . ? 
C29 C30 C31 O2 -8.1(5) . . . . ? 
C25 C30 C31 O2 171.5(3) . . . . ? 
C29 C30 C31 C32 176.6(3) . . . . ? 
C25 C30 C31 C32 -3.8(3) . . . . ? 
C23 C24 C32 N1 -1.2(4) . . . . ? 
C25 C24 C32 N1 179.0(2) . . . . ? 
C23 C24 C32 C31 173.4(2) . . . . ? 
C25 C24 C32 C31 -6.4(3) . . . . ? 
O2 C31 C32 N1 5.9(5) . . . . ? 
C30 C31 C32 N1 -178.9(2) . . . . ? 
O2 C31 C32 C24 -168.9(3) . . . . ? 
C30 C31 C32 C24 6.3(3) . . . . ? 
C13 C14 C33 C38 124.7(3) . . . . ? 
C15 C14 C33 C38 -52.8(4) . . . . ? 
C13 C14 C33 C34 -54.0(3) . . . . ? 
C15 C14 C33 C34 128.4(3) . . . . ? 
C38 C33 C34 C35 -0.9(4) . . . . ? 
C14 C33 C34 C35 177.9(2) . . . . ? 
C33 C34 C35 C36 1.3(4) . . . . ? 
C34 C35 C36 C37 -0.8(4) . . . . ? 
C35 C36 C37 C38 0.0(4) . . . . ? 
C34 C33 C38 C37 0.1(4) . . . . ? 
C14 C33 C38 C37 -178.7(2) . . . . ? 
C36 C37 C38 C33 0.4(4) . . . . ? 
C20 C19 C39 C40 -63.5(3) . . . . ? 
C18 C19 C39 C40 118.4(3) . . . . ? 
C20 C19 C39 C44 115.8(3) . . . . ? 
C18 C19 C39 C44 -62.3(4) . . . . ? 
C44 C39 C40 C41 0.4(4) . . . . ? 
C19 C39 C40 C41 179.7(3) . . . . ? 
C39 C40 C41 C42 -0.2(5) . . . . ? 
C40 C41 C42 C43 -0.5(5) . . . . ? 
C41 C42 C43 C44 1.0(5) . . . . ? 
C42 C43 C44 C39 -0.8(5) . . . . ? 
C40 C39 C44 C43 0.1(5) . . . . ? 
C19 C39 C44 C43 -179.2(3) . . . . ? 
C9 C1 N1 C32 -156.8(3) . . . . ? 
C2 C1 N1 C32 30.1(4) . . . . ? 
C9 C1 N1 Pt1 22.2(4) . . . . ? 
C2 C1 N1 Pt1 -150.9(2) . . . . ? 
C24 C32 N1 C1 -153.4(3) . . . . ? 
C31 C32 N1 C1 32.8(4) . . . . ? 
C24 C32 N1 Pt1 27.6(4) . . . . ? 
C31 C32 N1 Pt1 -146.2(2) . . . . ? 
C14 C13 N2 C10 169.4(3) . . . . ? 
C12 C13 N2 C10 -2.3(3) . . . . ? 
C14 C13 N2 Pt1 -12.3(4) . . . . ? 
C12 C13 N2 Pt1 175.92(18) . . . . ? 
C9 C10 N2 C13 -179.6(2) . . . . ? 
C11 C10 N2 C13 1.4(3) . . . . ? 
C9 C10 N2 Pt1 2.1(4) . . . . ? 
C11 C10 N2 Pt1 -176.90(18) . . . . ? 
C19 C18 N3 C15 -176.8(2) . . . . ? 
C17 C18 N3 C15 1.6(3) . . . . ? 
C19 C18 N3 Pt1 4.6(4) . . . . ? 
C17 C18 N3 Pt1 -177.04(17) . . . . ? 
C14 C15 N3 C18 -177.5(2) . . . . ? 
C16 C15 N3 C18 0.3(3) . . . . ? 
C14 C15 N3 Pt1 1.1(4) . . . . ? 
C16 C15 N3 Pt1 178.85(17) . . . . ? 
C24 C23 N4 C20 -174.7(2) . . . . ? 
C22 C23 N4 C20 2.1(3) . . . . ? 
C24 C23 N4 Pt1 8.3(4) . . . . ? 
C22 C23 N4 Pt1 -174.89(18) . . . . ? 
C19 C20 N4 C23 172.3(2) . . . . ? 
C21 C20 N4 C23 -2.7(3) . . . . ? 
C19 C20 N4 Pt1 -10.6(4) . . . . ? 
C21 C20 N4 Pt1 174.32(18) . . . . ? 
C18 N3 Pt1 N2 167.3(2) . . . . ? 
C15 N3 Pt1 N2 -11.1(2) . . . . ? 
C18 N3 Pt1 N4 -12.0(2) . . . . ? 
C15 N3 Pt1 N4 169.7(2) . . . . ? 
C13 N2 Pt1 N3 16.3(2) . . . . ? 
C10 N2 Pt1 N3 -165.7(2) . . . . ? 
C13 N2 Pt1 N1 -163.4(2) . . . . ? 
C10 N2 Pt1 N1 14.5(2) . . . . ? 
C1 N1 Pt1 N2 -25.3(2) . . . . ? 
C32 N1 Pt1 N2 153.6(2) . . . . ? 
C1 N1 Pt1 N4 153.9(2) . . . . ? 
C32 N1 Pt1 N4 -27.1(2) . . . . ? 
C23 N4 Pt1 N3 -168.7(2) . . . . ? 
C20 N4 Pt1 N3 14.8(2) . . . . ? 
C23 N4 Pt1 N1 11.0(2) . . . . ? 
C20 N4 Pt1 N1 -165.4(2) . . . . ? 

_diffrn_measured_fraction_theta_max    0.996 
_diffrn_reflns_theta_full              28.28 
_diffrn_measured_fraction_theta_full   0.996 
_refine_diff_density_max    1.879 
_refine_diff_density_min   -0.940 
_refine_diff_density_rms    0.129 
